# Supplementary material for: A Compendium of Mutational Signatures of Environmental Agents
Source: PubMed Central journal article supplement (PMC6506336; doi:10.1016/j.cell.2019.03.001), 2019-05-02
Supplement: mmc6.pdf [file mmc6.pdf]

| Ref>Alt |    | Alt         |         |             |             |             |         |             |         |        |        |        |        |             |         |         |         |
|---------|----|-------------|---------|-------------|-------------|-------------|---------|-------------|---------|--------|--------|--------|--------|-------------|---------|---------|---------|
|         |    | AA          | AC      | AG          | AT          | CA          | CC      | CG          | CT      | GA     | GC     | GG     | GT     | TA          | TC      | TG      | TT      |
| Ref     | AA | Grey        | Grey    | Grey        | Grey        | Grey        | Red     | Red         | Red     | Grey   | Red    | Red    | Red    | Grey        | Red     | Red     | Red     |
|         | AC | Grey        | Grey    | Grey        | Grey        | Green       | Grey    | Green       | Green   | Green  | Grey   | Green  | Green  | Green       | Grey    | Green   | Green   |
|         | AG | Grey        | Grey    | Grey        | Grey        | Green       | Green   | Grey        | Green   | Green  | Green  | Grey   | Green  | Green       | Green   | Grey    | Green   |
|         | AT | Grey        | Grey    | Grey        | Grey        | Yellow      | Yellow  | Yellow      | Grey    | Yellow | Yellow | White  | Grey   | Yellow      | White   | White   | Grey    |
|         | CA | Grey        | Orange  | Orange      | Orange      | Grey        | Grey    | Grey        | Grey    | Grey   | Orange | Orange | Orange | Grey        | Orange  | Orange  | Orange  |
|         | CC | Purple      | Grey    | Purple      | Purple      | Grey        | Grey    | Grey        | Grey    | Purple | Grey   | Purple | Purple | Purple      | Grey    | Purple  | Purple  |
|         | CG | Cyan        | Cyan    | Grey        | Cyan        | Grey        | Grey    | Grey        | Grey    | Cyan   | Cyan   | Grey   | White  | Cyan        | White   | Grey    | White   |
|         | GA | Grey        | Magenta | Magenta     | Magenta     | Grey        | Magenta | Magenta     | Magenta | Grey   | Grey   | Grey   | Grey   | Grey        | Magenta | Magenta | Magenta |
|         | GC | Light Green | Grey    | Light Green | Light Green | Light Green | Grey    | Light Green | White   | Grey   | Grey   | Grey   | Grey   | Light Green | Grey    | White   | White   |
|         | TA | Grey        | Pink    | Pink        | Pink        | Grey        | Pink    | Pink        | White   | Grey   | Pink   | White  | White  | Grey        | Grey    | Grey    | Grey    |

Table S6. Seventy-eight unique double-substitution types, Related to STAR Mthods. The reference and altered sequences are shown in column and row, respectively. Equivalent reference sequences are combined together, e.g., AA is equivalent to TT. Unqualified double-substitutions are shown in grey, e.g., AA>AC is not a double-substitution. Double-substitutions with different reference sequence are shown in different colours, and the colour code is the same as in Figure 4. White indicates that equivalent ones have been included, e.g., AT>GG is equivalent to AT>CC and has been included, so AT>GG is marked in white.
